# Supplementary material
Source: publisher figshare collection journal article supplement (https://gsajournals.figshare.com/ndownloader/files/14442806)
Supplement: Supplementary file 1 [file 14442806]

## Sheet: Sheet1
Gene Name	Abrevation	Accession_ID	Gene_Chr	Gene_Start	Gene_End	Organism	Cultivar	9k-SNPs_in this gene	SNP_Coding/non-coding	SNP_chr	SNP_physical_POS	Notes	Publications from	directly related to flowering time	Confiremed in Barley	Reference PUBMED id supported this	Reference title
HvPPD-H1/HvPRR37	HvPPD-H1/HvPRR37	AY970701.1	chr2H	29123913	29127452	Hordeum vulgare subsp. vulgare	Igri	BK_16	NA	chr2H	29124351	hit gene	Russell et al., 2016; Cockkram, et al., 2012	y	y	16284182	The pseudo-response regulator Ppd-H1 provides adaptation to photoperiod in barley
HvPPD-H1/HvPRR37	HvPPD-H1/HvPRR37	AY970701.1	chr2H	29123913	29127452	Hordeum vulgare subsp. vulgare	Igri	BK_15	NA	chr2H	29127414	hit gene	Russell et al., 2016; Cockkram, et al., 2012	y	y	16284183	The pseudo-response regulator Ppd-H1 provides adaptation to photoperiod in barley
HvPPD-H1/HvPRR37	HvPPD-H1/HvPRR37	AY970701.1	chr2H	29123913	29127452	Hordeum vulgare subsp. vulgare	Igri	12_30871	NA	chr2H	29127021	hit gene	Russell et al., 2016; Cockkram, et al., 2012	y	y	16284184	The pseudo-response regulator Ppd-H1 provides adaptation to photoperiod in barley
HvPPD-H1/HvPRR37	HvPPD-H1/HvPRR37	AY970701.1	chr2H	29123913	29127452	Hordeum vulgare subsp. vulgare	Igri	BK_14	NA	chr2H	29127021	hit gene	Russell et al., 2016; Cockkram, et al., 2012	y	y	16284185	The pseudo-response regulator Ppd-H1 provides adaptation to photoperiod in barley
HvPPD-H1/HvPRR37	HvPPD-H1/HvPRR37	AY970701.1	chr2H	29123913	29127452	Hordeum vulgare subsp. vulgare	Igri	12_30872	NA	chr2H	29124597	hit gene	Russell et al., 2016; Cockkram, et al., 2012	y	y	16284186	The pseudo-response regulator Ppd-H1 provides adaptation to photoperiod in barley
HvPPD-H1/HVPRR37	HvPPD-H1/HVPRR37	AY970701.1	chr2H	29123913	29127452	Hordeum vulgare subsp. vulgare	Igri	BK_13	NA	chr2H	29126530	hit gene	Russell et al., 2016; Cockkram, et al., 2012	y	y	16284187	The pseudo-response regulator Ppd-H1 provides adaptation to photoperiod in barley
HvPPD-H1/HvPRR37	HvPPD-H1/HvPRR37	EU331899.1	chr2H	29126117	29127452	Hordeum vulgare subsp. vulgare	Morex	BK_15	NA	chr2H	29127414	hit gene	Russell et al., 2016; Cockkram, et al., 2012	y	y	16284188	The pseudo-response regulator Ppd-H1 provides adaptation to photoperiod in barley
HvPPD-H1/HvPRR37	HvPPD-H1/HvPRR37	EU331899.1	chr2H	29126117	29127452	Hordeum vulgare subsp. vulgare	Morex	12_30871	NA	chr2H	29127021	hit gene	Russell et al., 2016; Cockkram, et al., 2012	y	y	16284189	The pseudo-response regulator Ppd-H1 provides adaptation to photoperiod in barley
HvPPD-H1/HvPRR37	HvPPD-H1/HvPRR37	EU331899.1	chr2H	29126117	29127452	Hordeum vulgare subsp. vulgare	Morex	BK_14	NA	chr2H	29127021	hit gene	Russell et al., 2016; Cockkram, et al., 2012	y	y	16284190	The pseudo-response regulator Ppd-H1 provides adaptation to photoperiod in barley
HvPPD-H1/HvPRR37	HvPPD-H1/HvPRR37	EU331899.1	chr2H	29126117	29127452	Hordeum vulgare subsp. vulgare	Morex	BK_16	NA	chr2H	29124351	hit gene	Russell et al., 2016; Cockkram, et al., 2012	y	y	16284191	The pseudo-response regulator Ppd-H1 provides adaptation to photoperiod in barley
HvPPD-H1/HvPRR37	HvPPD-H1/HvPRR37	EU331899.1	chr2H	29126117	29127452	Hordeum vulgare subsp. vulgare	Morex	12_30872	NA	chr2H	29124597	hit gene	Russell et al., 2016; Cockkram, et al., 2012	y	y	16284192	The pseudo-response regulator Ppd-H1 provides adaptation to photoperiod in barley
HvPPD-H1/HvPRR37	HvPPD-H1/HvPRR37	EU331899.1	chr2H	29126117	29127452	Hordeum vulgare subsp. vulgare	Morex	BK_12	NA	chr2H	29125743	hit gene	Russell et al., 2016; Cockkram, et al., 2012	y	y	16284193	The pseudo-response regulator Ppd-H1 provides adaptation to photoperiod in barley
HvPPD-H1/HvPRR37	HvPPD-H1/HvPRR37	EU331899.1	chr2H	29126117	29127452	Hordeum vulgare subsp. vulgare	Morex	BK_13	NA	chr2H	29126530	hit gene	Russell et al., 2016; Cockkram, et al., 2012	y	y	16284194	The pseudo-response regulator Ppd-H1 provides adaptation to photoperiod in barley
HvPPD-H1/HvPRR37	HvPPD-H1/HvPRR37	EU331899.1	chr2H	29126117	29127452	Hordeum vulgare subsp. vulgare	Morex	12_30870	NA	chr2H	29126143	hit gene	Russell et al., 2016; Cockkram, et al., 2012	y	y	16284195	The pseudo-response regulator Ppd-H1 provides adaptation to photoperiod in barley
HvPRR1/HvTOC1	HvPRR1/HvTOC1	JQ791234.1	chr6H	374867742	374868731	Hordeum vulgare subsp. vulgare	OWB-D	SCRI_RS_137464	NA	chr6H	374867096	647 bp away from interval	Alqudah, et al., 2016; Cockkram, et al., 2012	y	y	17713756	Barley ( Hordeum vulgare ) circadian clock genes can respond rapidly to temperature in an EARLY FLOWERING 3 -dependent manner
HvPRR1/HvTOC1	HvPRR1/HvTOC1	HQ850268.1	chr6H	374867742	374868731	Hordeum vulgare subsp. vulgare	Morex	SCRI_RS_137464	NA	chr6H	374867096	647 bp away from interval	Russell et al., 2016; Cockkram, et al., 2012	y	y	17713756	Barley ( Hordeum vulgare ) circadian clock genes can respond rapidly to temperature in an EARLY FLOWERING 3 -dependent manner
HvPhyA	PhyA	DQ201141.1	chr4H	23599413	23606044	Hordeum vulgare subsp. vulgare	Kompolti korai	12_30863	non-synonymous	chr4H	23601200	hit gene	Alqudah, et al., 2016	y	y	16489429	Positional relationships between photoperiod response QTL and photoreceptor and vernalization genes in barley
HvPhyA	PhyA	DQ201141.1	chr4H	23599413	23606044	Hordeum vulgare subsp. vulgare	Kompolti korai	12_30865	NA	chr4H	23601422	originally PhyA	Alqudah, et al., 2016	y	y	16489429	Positional relationships between photoperiod response QTL and photoreceptor and vernalization genes in barley
HvPhyA	PhyA	DQ201141.1	chr4H	23599413	23606044	Hordeum vulgare subsp. vulgare	Kompolti korai	12_30864	NA	chr4H	23604127	originally PhyA	Alqudah, et al., 2016	y	y	16489429	Positional relationships between photoperiod response QTL and photoreceptor and vernalization genes in barley
HvPhyA	PhyA	DQ201158.1	chr4H	23603434	23604252	Hordeum vulgare subsp. vulgare	Morex	12_30864	NA	chr4H	23604127	hit gene	Alqudah, et al., 2016	y	y	16489429	Positional relationships between photoperiod response QTL and photoreceptor and vernalization genes in barley
HvphyB	PhyB	DQ201142.1	chr4H	443994328	443997099	Hordeum vulgare subsp. vulgare	Dicktoo	12_30866	NA	chr4H	443996620	hit gene	Alqudah, et al., 2016	y	y	16489429	Positional relationships between photoperiod response QTL and photoreceptor and vernalization genes in barley
HvPhyC	PhyC	DQ238106.1	chr5H	598559162	598563688	Hordeum vulgare subsp. vulgare	Morex	12_30867	NA	chr5H	598560068	hit gene	Alqudah, et al., 2016	y	y	16489429	Positional relationships between photoperiod response QTL and photoreceptor and vernalization genes in barley.
HvPhyC	PhyC	DQ238106.1	chr5H	598559162	598563688	Hordeum vulgare subsp. vulgare	Morex	12_30868	nonsynonymous	chr5H	598562775	hit gene	Alqudah, et al., 2016	y	y	16489429	Positional relationships between photoperiod response QTL and photoreceptor and vernalization genes in barley.
HvPhyC	PhyC	DQ238106.1	chr5H	598559162	598563688	Hordeum vulgare subsp. vulgare	Morex	SCRI_RS_172665	NA	chr5H	598567807	4119 bp away from interval	Alqudah, et al., 2016	y	y	16489429	Positional relationships between photoperiod response QTL and photoreceptor and vernalization genes in barley.
HvPhyC	PhyC	DQ238106.1	chr5H	598559162	598563688	Hordeum vulgare subsp. vulgare	Morex	12_30668	NA	chr5H	598568590	4902 bp away from interval	Alqudah, et al., 2016	y	y	16489429	Positional relationships between photoperiod response QTL and photoreceptor and vernalization genes in barley.
HvPhyC	PhyC	DQ238106.1	chr5H	598559162	598563688	Hordeum vulgare subsp. vulgare	Morex	12_30869	non-coding	chr5H	598563697	9 bp away from interval	Alqudah, et al., 2016	y	y	16489429	Positional relationships between photoperiod response QTL and photoreceptor and vernalization genes in barley.
HvPhyC	PhyC	AB827939.1	chr5H	598559162	598563688	Hordeum vulgare subsp. vulgare	Hayakiso 2	12_30867	NA	chr5H	598560068	hit gene	Alqudah, et al., 2016	y	y	16489429	Positional relationships between photoperiod response QTL and photoreceptor and vernalization genes in barley.
HvPhyC	PhyC	AB827939.1	chr5H	598559162	598563688	Hordeum vulgare subsp. vulgare	Hayakiso 2	SCRI_RS_172665	NA	chr5H	598567807	4119 bp away from interval	Alqudah, et al., 2016	y	y	16489429	Positional relationships between photoperiod response QTL and photoreceptor and vernalization genes in barley.
HvPhyC	PhyC	AB827939.1	chr5H	598559162	598563688	Hordeum vulgare subsp. vulgare	Hayakiso 2	12_30869	non-coding	chr5H	598563697	9 bp away from interval	Alqudah, et al., 2016	y	y	16489429	Positional relationships between photoperiod response QTL and photoreceptor and vernalization genes in barley.
HvPhyC	PhyC	AB827939.1	chr5H	598559162	598563688	Hordeum vulgare subsp. vulgare	Hayakiso 2	12_30668	NA	chr5H	598568590	4902 bp away from interval	Alqudah, et al., 2016	y	y	16489429	Positional relationships between photoperiod response QTL and photoreceptor and vernalization genes in barley.
HvPhyC	PhyC	AB827939.1	chr5H	598559162	598563688	Hordeum vulgare subsp. vulgare	Hayakiso 2	12_30868	NA	chr5H	598562775	hit gene	Alqudah, et al., 2016	y	y	16489429	Positional relationships between photoperiod response QTL and photoreceptor and vernalization genes in barley.
Vrn-H1	Vrn-H1	EF591648.1	chr5H	599127174	599131915	Hordeum vulgare subsp. vulgare	Xenia	12_30930	NA	chr5H	599128110	hit gene	Alqudah, et al., 2016	y	y	17713756	Haplotype analysis of vernalization loci in European barley germplasm reveals novel VRN-H1 alleles and a predominant winter VRN-H1/VRN-H2 multi-locus haplotype.
Vrn-H1	Vrn-H1	EF591648.1	chr5H	599127174	599131915	Hordeum vulgare subsp. vulgare	Xenia	BK_17	NA	chr5H	599123281	3894 bp away from interval	Alqudah, et al., 2016	y	y	17713756	Haplotype analysis of vernalization loci in European barley germplasm reveals novel VRN-H1 alleles and a predominant winter VRN-H1/VRN-H2 multi-locus haplotype.
Vrn-H1	Vrn-H1	EF591648.1	chr5H	599127174	599131915	Hordeum vulgare subsp. vulgare	Xenia	11_20188	NA	chr5H	599123281	3894 bp away from interval	Alqudah, et al., 2016	y	y	17713756	Haplotype analysis of vernalization loci in European barley germplasm reveals novel VRN-H1 alleles and a predominant winter VRN-H1/VRN-H2 multi-locus haplotype.
Vrn-H1	Vrn-H1	AY785815.1	chr5H	599132810	599135002	Hordeum vulgare subsp. vulgare	Morex	12_30929	NA	chr5H	599134827	hit gene	unknown	y	y	17713756	Haplotype analysis of vernalization loci in European barley germplasm reveals novel VRN-H1 alleles and a predominant winter VRN-H1/VRN-H2 multi-locus haplotype.
Vrn-H2/HvZCCT-Ha/b/c	Vrn-H2/HvZCCT-Ha/b/c	AK365195.1	chr4H	637486408	637486878	Hordeum vulgare subsp. vulgare	Haruna Nijo	SCRI_RS_151357	non-coding	chr4H	637486511	ZCCT-Ha	Alqudah, et al., 2016	y	y	17713756	Haplotype analysis of vernalization loci in European barley germplasm reveals novel VRN-H1 alleles and a predominant winter VRN-H1/VRN-H2 multi-locus haplotype.
Vrn-H3/HvFT1	Vrn-H3/HvFT1	EU007827.1	chr7H	39678287	39684042	Hordeum vulgare subsp. vulgare	Dicktoo	12_30895	NA	chr7H	39680381	hit gene	Russell et al., 2016	y	y	17713756	Haplotype analysis of vernalization loci in European barley germplasm reveals novel VRN-H1 alleles and a predominant winter VRN-H1/VRN-H2 multi-locus haplotype.
Vrn-H3/HvFT1	Vrn-H3/HvFT1	EU007827.1	chr7H	39678287	39684042	Hordeum vulgare subsp. vulgare	Dicktoo	12_30894	NA	chr7H	39680495	hit gene	Russell et al., 2016	y	y	17713756	Haplotype analysis of vernalization loci in European barley germplasm reveals novel VRN-H1 alleles and a predominant winter VRN-H1/VRN-H2 multi-locus haplotype.
Vrn-H3/HvFT1	Vrn-H3/HvFT1	EU007827.1	chr7H	39678287	39684042	Hordeum vulgare subsp. vulgare	Dicktoo	12_30893	NA	chr7H	39680702	hit gene	Russell et al., 2016	y	y	17713756	Haplotype analysis of vernalization loci in European barley germplasm reveals novel VRN-H1 alleles and a predominant winter VRN-H1/VRN-H2 multi-locus haplotype.
Vrn-H3/HvFT1	Vrn-H3/HvFT1	DQ100327.1	chr7H	39679854	39682299	Hordeum vulgare subsp. vulgare	Morex	12_30895	NA	chr7H	39680381	hit gene	Russell et al., 2016	y	y	17713756	Haplotype analysis of vernalization loci in European barley germplasm reveals novel VRN-H1 alleles and a predominant winter VRN-H1/VRN-H2 multi-locus haplotype.
Vrn-H3/HvFT1	Vrn-H3/HvFT1	DQ100327.1	chr7H	39679854	39682299	Hordeum vulgare subsp. vulgare	Morex	12_30893	NA	chr7H	39680495	hit gene	Russell et al., 2016	y	y	17713756	Haplotype analysis of vernalization loci in European barley germplasm reveals novel VRN-H1 alleles and a predominant winter VRN-H1/VRN-H2 multi-locus haplotype.
Vrn-H3/HvFT1	Vrn-H3/HvFT1	DQ100327.1	chr7H	39679854	39682299	Hordeum vulgare subsp. vulgare	Morex	12_30894	NA	chr7H	39680702	hit gene	Russell et al., 2016	y	y	17713756	Haplotype analysis of vernalization loci in European barley germplasm reveals novel VRN-H1 alleles and a predominant winter VRN-H1/VRN-H2 multi-locus haplotype.
Vrn-H3/HvFT1-promoter	Vrn-H3/HvFT1-promoter	EU331775.1	chr7H	39681957	39682299	Hordeum vulgare subsp. vulgare	Morex	12_30895	NA	chr7H	39680381	1463bp away from interval	Alqudah, et al., 2016	y	y	21159198	Genome-wide SNPs and re-sequencing of growth habit and inflorescence genes in barley: implications for association mapping in germplasm arrays varying in size and structure
Vrn-H3/HvFT1-promoter	Vrn-H3/HvFT1-promoter	EU331775.1	chr7H	39681957	39682299	Hordeum vulgare subsp. vulgare	Morex	12_30894	NA	chr7H	39680495	1463bp away from interval	Alqudah, et al., 2016	y	y	21159198	Genome-wide SNPs and re-sequencing of growth habit and inflorescence genes in barley: implications for association mapping in germplasm arrays varying in size and structure
Vrn-H3/HvFT1-promoter	Vrn-H3/HvFT1-promoter	EU331775.1	chr7H	39681957	39682299	Hordeum vulgare subsp. vulgare	Morex	12_30894	NA	chr7H	39680702	1256 away from interval	Alqudah, et al., 2016	y	y	21159198	Genome-wide SNPs and re-sequencing of growth habit and inflorescence genes in barley: implications for association mapping in germplasm arrays varying in size and structure
